# Supplementary material for: The Effect of the Ala16Val Mutation on the Secondary Structure of the Manganese Superoxide Dismutase Mitochondrial Targeting Sequence
Source: MDPI journal article supplement (doi:10.3390/antiox11122348), 2022-11-27
Supplement: s1 [file s1]

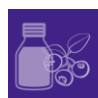

## Supplementary Information

for

## The Effect of the Ala16Val Mutation on the Secondary Structure of the Manganese Superoxide Dismutase Mitochondrial Targeting Sequence

Matic Broz <sup>1</sup>, Veronika Furlan <sup>1</sup>, Samo Lešnik <sup>1,2</sup>, Marko Jukič <sup>1,3</sup> and Urban Bren <sup>1,2,3,\*</sup><sup>1</sup> Faculty of Chemistry and Chemical Engineering, University of Maribor, Smetanova ulica 17, SI-2000 Maribor, Slovenia<sup>2</sup> Institute of Environmental Protection and Sensors, Beloruska ulica 7, SI-2000 Maribor, Slovenia<sup>3</sup> Faculty of Mathematics, Natural Sciences and Information Technologies, University of Primorska, Glagoljaška ulica 8, SI-6000 Koper, Slovenia

\* Correspondence: urban.bren@um.si

**Table S1** The most common hydrogen bonds formed by the MTS with the rest of the protein or itself sorted based on their occupancy. The hydrogen bonds formed with solvent or ions are not included.

| Donor     | Alanine<br>Acceptor | Occupancy<br>[%] | Donor     | Valine<br>Acceptor | Occupancy<br>[%] |
|-----------|---------------------|------------------|-----------|--------------------|------------------|
| Leu20 N   | Ala16 O             | 43.50%           | Arg23 Nh2 | Glu66 OE2          | 36.30%           |
| Leu17 N   | Leu13 O             | 39.60%           | Arg23 Nh1 | Glu66 OE           | 35.90%           |
| Thr9 OG1  | Ala5 O              | 31.30%           | Tyr69 OH  | Gln12 O            | 35.10%           |
| Cys7 N    | Ser3 O              | 29.70%           | Leu17 N   | Leu13 O            | 25.40%           |
| Ser10 N   | Val6 O              | 29.20%           | Arg23 Nh2 | Glu66 OE           | 21.30%           |
| Thr9 N    | Ala5 O              | 28.50%           | Arg23 Nh1 | Glu66 OE2          | 21.00%           |
| Leu13 N   | Thr9 O              | 27.60%           | Asn63 Nd2 | Gln24 O            | 18.00%           |
| Arg23 NH1 | Leu20 O             | 26.80%           | Cys7 N    | Ser3 O             | 16.20%           |
| Gly8 N    | Arg4 O              | 26.70%           | Thr9 OG1  | Ala5 O             | 15.50%           |
| Arg23 Ne  | Asn63 OD            | 25.80%           | Arg23 NH2 | Asn63 OD           | 13.50%           |
| Arg23 NH2 | Glu66 OE            | 25.40%           | Val6 N    | Leu2 O             | 10.60%           |
| Arg23 NH1 | Glu66 OE            | 23.90%           | Gly8 N    | Arg4 O             | 10.60%           |
| Arg23 NH1 | Glu66 OE2           | 23.80%           | Thr9 N    | Ala5 O             | 9.80%            |
| Arg23 NH2 | Glu66 OE2           | 22.80%           | Leu13 N   | Thr9 O             | 8.40%            |
| Arg11 N   | Cys7 O              | 17.20%           | Ser10 OG  | Val6 O             | 7.90%            |
| Ser10 OG  | Val6 O              | 16.80%           | Gln12 NE2 | Gln81 OE           | 7.90%            |
| Val6 N    | Leu2 O              | 16.40%           | Ser10 N   | Val6 O             | 6.50%            |
| Tyr19 N   | Pro15 O             | 16.10%           | Leu2 N    | Gln70 OE           | 4.50%            |
| Gly21 N   | Leu17 O             | 14.20%           | Ser10 OG  | Cys7 O             | 4.00%            |
| Gln81 NE2 | Thr9 OG1            | 12.20%           | Gly18 N   | Ala14 O            | 3.80%            |
| Gln12 N   | Gly8 O              | 11.90%           | Arg11 N   | Cys7 O             | 3.60%            |
| Arg23 NH2 | Asn63 OD            | 9.70%            | Gln24 NE2 | Hsd26 O            | 3.50%            |

|                |                |              |                  |                |              |
|----------------|----------------|--------------|------------------|----------------|--------------|
| Arg23 NH1      | Gly21 O        | 6.10%        | Ser22 OG         | Gln24 OE       | 3.30%        |
| Gln12 NE2      | Gly8 O         | 4.60%        | Gln12 N          | Thr9 O         | 3.00%        |
| Ala14 N        | Ser10 O        | 4.40%        | Hsd95 Nd         | Leu20 O        | 2.70%        |
| Lys25 Nz       | Arg23 O        | 4.30%        | Gln12 NE2        | Gln85 OE       | 2.30%        |
| Thr9 OG1       | Gln81 OE       | 4.00%        | Gln12 N          | Gly8 O         | 2.20%        |
| Ser27 OG       | Gln24 O        | 3.90%        | Gln12 NE2        | Gly8 O         | 1.90%        |
| Gln85 NE2      | Gln12 OE       | 3.60%        | Ala14 N          | Ser10 O        | 1.90%        |
| <b>Ala16 N</b> | <b>Gln12 O</b> | <b>2.60%</b> | Gln85 NE2        | Gln12 OE       | 1.80%        |
| Hsd26 N        | Gln24 OE       | 2.20%        | Arg11 NH1        | Arg11 O        | 1.70%        |
| Gln24 N        | Gln24 OE       | 1.70%        | Ser27 OG         | Gln24 O        | 1.40%        |
| Leu28 N        | Gln24 OE       | 1.30%        | Ser22 N          | Hsd95 NE2      | 1.20%        |
| Arg11 NH1      | Arg11 O        | 1.30%        | Gly8 N           | Ala5 O         | 1.20%        |
| Gln24 NE2      | Hsd26 O        | 1.20%        | <b>Val16 N</b>   | <b>Leu13 O</b> | <b>1.00%</b> |
| Ala5 N         | Leu2 O         | 0.80%        | Gln24 NE2        | Ser27 O        | 1.00%        |
| Gln24 NE2      | Ser27 O        | 0.80%        | Gln24 NE2        | Arg23 O        | 0.90%        |
| Arg23 NH2      | Glu66 CD       | 0.70%        | Gln24 N          | Ser22 OG       | 0.80%        |
| Ser10 OG       | Cys7 O         | 0.70%        | Hsd26 N          | Gln24 OE       | 0.80%        |
| Ser27 N        | Gln24 O        | 0.60%        | Lys25 N          | Gln24 OE       | 0.80%        |
| Gly18 N        | Ala14 O        | 0.60%        | Gln24 NE2        | Ser22 OG       | 0.70%        |
| Gln85 NE2      | Gln12 O        | 0.60%        | Ala5 N           | Leu2 O         | 0.70%        |
| Tyr69 OH       | Gln12 O        | 0.60%        | Met1 N           | Gln70 OE       | 0.70%        |
| Gln81 NE2      | Thr9 O         | 0.50%        | Gln24 NE2        | Hsd55 NE2      | 0.70%        |
| Ser22 OG       | Ser27 OG       | 0.40%        | Tyr19 N          | Pro15 O        | 0.60%        |
| Lys25 N        | Gln24 OE       | 0.40%        | Ser3 OG          | Gln70 O        | 0.60%        |
| Ala5 N         | Met1 O         | 0.40%        | Arg11 N          | Gln81 OE       | 0.60%        |
| Gln24 NE2      | Leu28 O        | 0.40%        | Arg11 Ne         | Gln12 OE       | 0.50%        |
| Ser27 N        | Gln24 OE       | 0.40%        | Met1 N           | Ala74 O        | 0.50%        |
| Gln12 N        | Thr9 O         | 0.40%        | Leu13 N          | Ser10 O        | 0.50%        |
| Ser27 OG       | Ser22 OG       | 0.30%        | Cys7 N           | Arg4 O         | 0.50%        |
| <b>Tyr19 N</b> | <b>Ala16 O</b> | <b>0.30%</b> | Gln12 N          | Gln81 OE       | 0.50%        |
| Arg4 NH1       | Arg4 O         | 0.30%        | Ser22 OG         | Gln24 O        | 0.40%        |
| Arg4 Ne        | Arg4 O         | 0.30%        | Gln81 NE2        | Thr9 OG1       | 0.40%        |
| Gln12 NE2      | Gln12 O        | 0.30%        | Ser10 OG         | Gln70 OE       | 0.40%        |
| Gln12 NE2      | Gln81 OE       | 0.30%        | Gln12 NE2        | Arg11 O        | 0.40%        |
| Gln24 NE2      | Ser22 O        | 0.20%        | Leu17 N          | Ala14 O        | 0.40%        |
| Ser22 OG       | Gln24 OE       | 0.20%        | Arg4 NH1         | Ser3 O         | 0.40%        |
| Gln171 NE2     | Gly18 O        | 0.20%        | Gln81 NE2        | Thr9 O         | 0.40%        |
| Gly18 N        | Pro15 O        | 0.20%        | Gly8 N           | Ala74 O        | 0.40%        |
| Leu20 N        | Leu17 O        | 0.20%        | Tyr69 OH         | Ser10 OG       | 0.40%        |
| Leu28 N        | Gln24 O        | 0.20%        | Arg23 NH1        | Gly21 O        | 0.30%        |
| Asn63 Nd2      | Gln24 O        | 0.20%        | Arg23 NH1        | Leu20 O        | 0.30%        |
| Gln24 NE2      | Asp30 OD       | 0.20%        | Lys25 Nz         | Ser22 O        | 0.30%        |
| Tyr19 OH       | Gln85 OE       | 0.10%        | <b>Tyr19 N</b>   | <b>Val16 O</b> | <b>0.30%</b> |
| Gln171 NE2     | Tyr19 O        | 0.10%        | Val6 N           | Ser3 O         | 0.30%        |
| Gln24 N        | Ser22 OG       | 0.10%        | Gln24 NE2        | Ser22 O        | 0.30%        |
| Gln24 NE2      | Leu20 O        | 0.10%        | Arg11 NH1        | Gln12 OE       | 0.30%        |
| Gln24 NE2      | Ser22 OG       | 0.10%        | Thr9 OG1         | Gln12 OE       | 0.30%        |
| Met1 N         | Lys75 O        | 0.10%        | Ser3 N           | Gln70 OE       | 0.30%        |
| Ser27 OG       | Ser22 O        | 0.10%        | Arg11 NH1        | Thr9 O         | 0.30%        |
| Met1 N         | Ala74 O        | 0.10%        | Ala5 N           | Met1 O         | 0.20%        |
| Ser3 OG        | Leu2 O         | 0.10%        | <b>Arg23 NH2</b> | <b>Val16 O</b> | <b>0.20%</b> |

|           |           |       |            |           |       |
|-----------|-----------|-------|------------|-----------|-------|
| Ser3 OG   | Gly76 O   | 0.10% | Arg11 NH1  | Ser10 OG  | 0.20% |
| Arg4 NH1  | Ser3 OG   | 0.10% | Gln70 NE2  | Val6 O    | 0.20% |
| Lys89 Nz  | Tyr19 OH  | 0.10% | Arg23 N    | Hsd95 NE2 | 0.20% |
| Gln24 NE2 | Hsd26 NE2 | 0.10% | Arg4 NH1   | Ser3 OG   | 0.20% |
| Gln12 NE2 | Gln85 OE  | 0.10% | Gln12 N    | Thr9 OG1  | 0.20% |
| Cys7 Sg   | Ser3 O    | 0.10% | Gln12 NE2  | Thr9 OG1  | 0.20% |
| Gln24 NE2 | Asp30 OD2 | 0.10% | Met1 N     | Glu71 OE  | 0.20% |
| Asp30 N   | Gln24 OE  | 0.10% | Gln81 NE2  | Gln12 OE  | 0.20% |
| Ser27 OG  | Arg23 O   | 0.10% | Arg11 N    | Thr9 OG1  | 0.20% |
| Ala14 N   | Arg11 O   | 0.10% | Tyr19 OH   | Ser22 OG  | 0.20% |
| Hsd26 Nd  | Gln24 OE  | 0.10% | Arg4 NH1   | Ala74 O   | 0.20% |
| Gln24 NE2 | Arg23 O   | 0.10% | Met1 N     | Glu67 OE  | 0.20% |
|           |           |       | ARG4 NE    | LEU73 O   | 0.20% |
|           |           |       | ARG4 NE    | VAL6 O    | 0.20% |
|           |           |       | SER3 N     | LYS75 O   | 0.20% |
|           |           |       | THR9 OG1   | GLY8 O    | 0.20% |
|           |           |       | SER10 OG   | GLN12 O   | 0.20% |
|           |           |       | ARG23 NH2  | ASP30 OD  | 0.10% |
|           |           |       | GLN171 NE2 | LEU20 O   | 0.10% |
|           |           |       | TYR19 OH   | GLN85 OE  | 0.10% |
|           |           |       | GLN24 NE2  | SER27 OG  | 0.10% |
|           |           |       | SER22 OG   | HSD95 NE2 | 0.10% |
|           |           |       | ARG4 NH2   | SER3 OG   | 0.10% |
|           |           |       | LYS25 N    | SER22 OG  | 0.10% |
|           |           |       | LYS25 NZ   | ARG23 O   | 0.10% |
|           |           |       | GLN85 NE2  | GLN12 O   | 0.10% |
|           |           |       | TYR69 OH   | GLN12 OE  | 0.10% |
|           |           |       | LYS89 NZ   | GLY18 O   | 0.10% |
|           |           |       | SER27 N    | GLN24 OE  | 0.10% |
|           |           |       | GLN24 NE2  | HSD26 NE2 | 0.10% |
|           |           |       | SER22 OG   | HSD26 NE2 | 0.10% |
|           |           |       | GLN70 NE2  | SER10 OG  | 0.10% |
|           |           |       | ARG23 NH1  | GLU66 CD  | 0.10% |
|           |           |       | MET1 N     | GLU71 OE2 | 0.10% |
|           |           |       | GLN12 NE2  | CYS7 O    | 0.10% |
|           |           |       | HSD95 CE   | SER22 O   | 0.10% |
|           |           |       | CYS7 SG    | SER3 O    | 0.10% |
|           |           |       | SER22 OG   | HSD55 NE2 | 0.10% |
|           |           |       | GLN24 NE2  | GLN24 O   | 0.10% |
|           |           |       | ARG11 NH2  | SER10 OG  | 0.10% |
|           |           |       | LEU28 N    | GLN24 OE  | 0.10% |
|           |           |       | ARG4 NH2   | ALA74 O   | 0.10% |
|           |           |       | MET1 N     | GLU67 OE2 | 0.10% |
|           |           |       | GLN12 NE2  | TYR69 OH  | 0.10% |
|           |           |       | ARG4 NH1   | GLN70 OE  | 0.10% |
|           |           |       | ALA14 N    | ARG11 O   | 0.10% |
|           |           |       | CYS7 SG    | ARG4 O    | 0.10% |
|           |           |       | ARG4 N     | GLY76 O   | 0.10% |
|           |           |       | HSD95 ND   | SER22 O   | 0.10% |
|           |           |       | ARG4 NH1   | VAL6 O    | 0.10% |
|           |           |       | HSD26 ND   | GLN24 OE  | 0.10% |

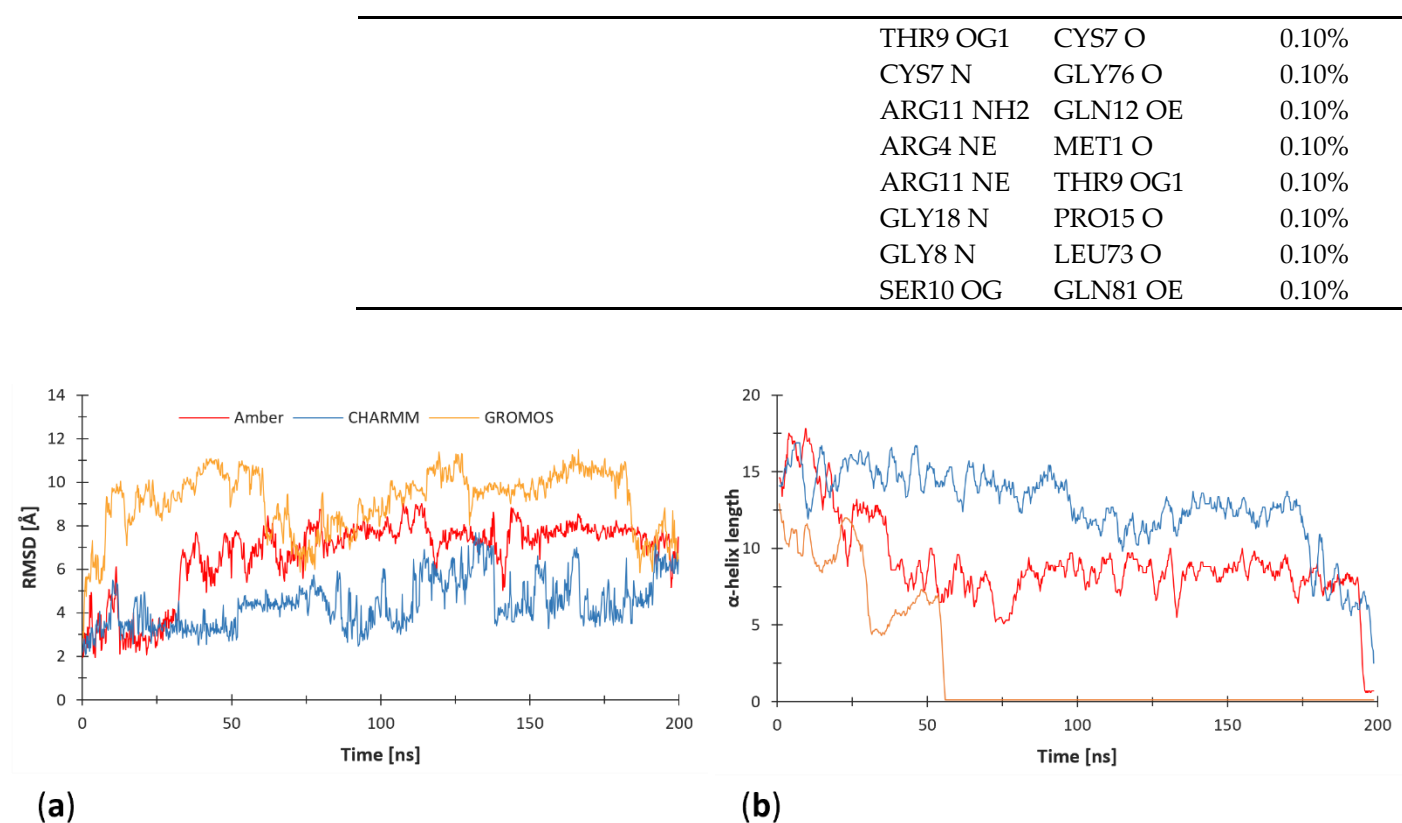

**Figure S1** A graphical comparison of the PEP-FOLD3 Val-MTS model in three different force fields: Amber, CHARMM, and GROMOS. The graphs depict (a) RMSD values and (b) the lengths of the  $\alpha$ -helix.

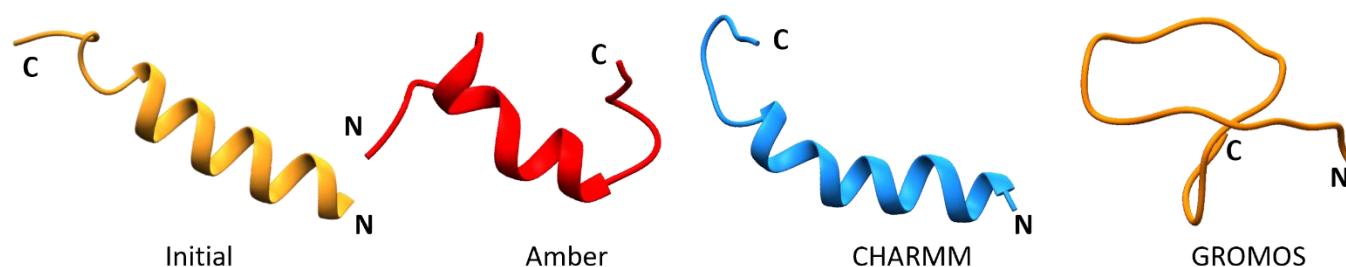

**Figure S2** A cartoon representations of the initial PEP-FOLD3 Val-MTS structure with the most common structural clusters in MD simulations using Amber, CHARMM, and GROMOS force fields.

| 1               | 5 | 10 | 16       | 20         | 24         |                                                       |                                               |
|-----------------|---|----|----------|------------|------------|-------------------------------------------------------|-----------------------------------------------|
| MLSRAVCGTSRQLAP |   |    | <b>V</b> | LG         | YL         | GSRQ – Homo sapiens (P04179)                          |                                               |
| MLSRAVCGTSRQLAP |   |    | <b>A</b> | LG         | YL         | GSRQ – Pan troglodytes (A0A2I3T2J1)                   |                                               |
| MLSRAVCGTSRQLAP |   |    | <b>A</b> | LG         | YL         | GSRQ – Pan paniscus A0A2R9BMB0                        |                                               |
| MLSRAVCGTGRQLAP |   |    | <b>A</b> | LG         | YL         | GSRQ – Macaca nemestrina (Q5FB30)                     |                                               |
| MLSRAVCGTGRQLAP |   |    | <b>A</b> | LG         | YL         | GSRQ – Rhinopithecus roxellana (A0A2K6NUA4)           |                                               |
| MLSRAVCGTGRQLAP |   |    | <b>A</b> | LG         | YL         | GSRQ – Macaca fascicularis (Q8HXP3)                   |                                               |
| MLSRAVCGTGRQLAP |   |    | <b>A</b> | LG         | YL         | GSRQ – Cebus imitator (A0A2K5QGB9)                    |                                               |
| MLSRAVCGTRRQLAP |   |    | <b>A</b> | LG         | YL         | GSRQ – Macaca nemestrina (A0A2K6BV32)                 |                                               |
| MLSRAVCGTGRQLAL |   |    | <b>A</b> | LG         | YL         | GSRQ – Aotus nancymae (A0A2K5CX40)                    |                                               |
| MLSRAACSTSRKLV  |   |    | <b>A</b> | LG         | <b>V</b> L | GSRQ – Ovis aries (C8BKD6)                            |                                               |
| MTARAYTSRQLAP   |   |    | <b>A</b> | LG         | YL         | GSRQ – Mandrillus leucophaeus (A0A2K5YFD5)            |                                               |
| MLSRAACSGARLAP  |   |    | <b>A</b> | LG         | <b>A</b> L | <b>G</b> CRQ – Spermophilus tridecemlineatus (I3MC61) |                                               |
| MLASTSRQLAP     |   |    | <b>A</b> | LG         | YL         | GSRQ – Western lowland gorilla (G3QYT5)               |                                               |
| MLSRAACSTSRRLVP |   |    | <b>A</b> | L          | <b>S</b> V | L GSRQ – Bos taurus (P41976)                          |                                               |
| MLSRAALSSSRTLVP |   |    | <b>A</b> | LG         | <b>A</b> L | GSRQ – Panthera leo (A0A8C8WJT4)                      |                                               |
| MLCRVMSRRTSKLV  |   |    | <b>A</b> | LG         | <b>C</b> L | GSRQ – Monodelphis domestica (F7GJS0)                 |                                               |
| MLCRAVCASRLAP   |   |    | <b>A</b> | LG         | <b>I</b> L | <b>G</b> VRQ – Cavia porcellus (P49114)               |                                               |
| MLCRAACSTSRKLV  |   |    | <b>A</b> | LG         | <b>S</b> L | GSRQ – Equus caballus (Q9XS41)                        |                                               |
| MLCRAACSAGRRLGP |   |    | <b>A</b> | <b>A</b> S | <b>T</b> A | <b>G</b> SRH – Rattus norvegicus (P07895)             |                                               |
| MLCRAACSTGRRLGP |   |    | <b>V</b> | <b>A</b> G | <b>A</b> A | <b>G</b> SRH – Mus musculus (P09671)                  |                                               |
| MLPYAACASRLAP   |   |    | <b>A</b> | LG         | <b>I</b> L | <b>G</b> VRQ – Cavia porcellus (P49114)               |                                               |
| MLCRVASSAGRSLSP |   |    | <b>A</b> | LG         | <b>A</b> L | GSRQ – Castor canadensis (A0A250YCN7)                 |                                               |
| MLCRAACSAGGRLAP |   |    | <b>A</b> | <b>A</b> T | <b>A</b> A | <b>G</b> CRQ – Mesocricetus auratus (A0A1U7QH60)      |                                               |
| MLCRLSSAGRSSVKV |   |    | <b>V</b> | <b>A</b> P | <b>L</b> G | <b>C</b> L                                            | <b>A</b> S – Melopsittacus undulatus (Q802D9) |

**Figure S3** A comparison of MTS sequences between various species. Red letters represent amino acids different from the *Homo sapiens* MTS sequence. Bolded letters represent the Ala16Val substitution in the *Homo sapiens* genome, which is scarcely present in other species' genomes.

## Psipred secondary structure prediction

ALA variant

job,step,type,name,version,parameters

psipred,0,Dataset,uniref90,latest,"null"

psipred,0,Dataset,hhdb uniclust30,2018\_08,"null"

psipred,0,Software,psiblast,2.2.26,"-a 2 -b 0 -j 20 -h 0.01 -I F"

psipred,0,Software,hhlits,2.0.16,"-iterations 3 -diff inf -cov 10 -Z 10000 -B 10000 -maxfilt 10000 -maxmem 5 -norealign"

psipred,1,Software,psipred,4.1,"null"

psipred,2,Software,psipass2,4.1,"null"

# PSIPRED VFORMAT (PSIPRED V4.0)

---

|               |              |              |              |
|---------------|--------------|--------------|--------------|
| 1 M C         | 0.999        | 0.001        | 0.000        |
| 2 L C         | 0.633        | 0.371        | 0.018        |
| 3 S H         | 0.249        | 0.713        | 0.013        |
| 4 R H         | 0.141        | 0.838        | 0.016        |
| 5 A H         | 0.148        | 0.837        | 0.009        |
| 6 V H         | 0.270        | 0.731        | 0.005        |
| 7 C H         | 0.272        | 0.720        | 0.006        |
| 8 G H         | 0.200        | 0.793        | 0.004        |
| 9 T H         | 0.160        | 0.828        | 0.003        |
| 10 S H        | 0.101        | 0.891        | 0.005        |
| 11 R H        | 0.333        | 0.658        | 0.003        |
| 12 Q H        | 0.223        | 0.762        | 0.004        |
| 13 L H        | 0.193        | 0.798        | 0.004        |
| 14 A H        | 0.124        | 0.863        | 0.005        |
| 15 P H        | 0.068        | 0.927        | 0.005        |
| <b>16 A H</b> | <b>0.155</b> | <b>0.839</b> | <b>0.007</b> |
| 17 L H        | 0.394        | 0.609        | 0.008        |
| 18 G H        | 0.361        | 0.634        | 0.013        |
| 19 Y H        | 0.149        | 0.840        | 0.027        |
| 20 L H        | 0.223        | 0.769        | 0.021        |
| 21 G H        | 0.462        | 0.545        | 0.012        |
| 22 S C        | 0.668        | 0.345        | 0.017        |
| 23 R C        | 0.767        | 0.212        | 0.026        |
| 24 Q C        | 0.895        | 0.089        | 0.027        |
| 25 K C        | 0.859        | 0.055        | 0.067        |
| 26 H C        | 0.544        | 0.065        | 0.387        |
| 27 S C        | 0.606        | 0.022        | 0.373        |
| 28 L C        | 0.948        | 0.008        | 0.039        |
| 29 P C        | 0.986        | 0.007        | 0.011        |
| 30 D C        | 0.974        | 0.015        | 0.007        |
| 31 L C        | 0.982        | 0.010        | 0.005        |
| 32 P C        | 0.988        | 0.005        | 0.004        |
| 33 Y C        | 0.979        | 0.010        | 0.005        |
| 34 D C        | 0.977        | 0.012        | 0.004        |
| 35 Y C        | 0.746        | 0.277        | 0.004        |
| 36 G C        | 0.833        | 0.191        | 0.007        |
| 37 A C        | 0.827        | 0.190        | 0.015        |
| 38 L C        | 0.820        | 0.201        | 0.018        |
| 39 E C        | 0.590        | 0.376        | 0.016        |
| 40 P C        | 0.537        | 0.379        | 0.032        |
| 41 H C        | 0.663        | 0.269        | 0.086        |

---

|        |       |       |       |
|--------|-------|-------|-------|
| 42 I C | 0.424 | 0.393 | 0.224 |
| 43 N C | 0.903 | 0.070 | 0.020 |
| 44 A H | 0.043 | 0.950 | 0.001 |
| 45 Q H | 0.022 | 0.978 | 0.001 |
| 46 I H | 0.028 | 0.973 | 0.001 |
| 47 M H | 0.030 | 0.971 | 0.002 |
| 48 Q H | 0.073 | 0.927 | 0.004 |
| 49 L H | 0.061 | 0.939 | 0.007 |
| 50 H H | 0.170 | 0.828 | 0.005 |
| 51 H H | 0.387 | 0.600 | 0.003 |
| 52 S H | 0.079 | 0.914 | 0.003 |
| 53 K H | 0.051 | 0.948 | 0.003 |
| 54 H H | 0.094 | 0.898 | 0.003 |
| 55 H H | 0.034 | 0.965 | 0.002 |
| 56 A H | 0.011 | 0.990 | 0.001 |
| 57 A H | 0.010 | 0.991 | 0.001 |
| 58 Y H | 0.022 | 0.978 | 0.001 |
| 59 V H | 0.033 | 0.968 | 0.001 |
| 60 N H | 0.045 | 0.954 | 0.001 |
| 61 N H | 0.046 | 0.952 | 0.001 |
| 62 L H | 0.015 | 0.985 | 0.001 |
| 63 N H | 0.009 | 0.991 | 0.000 |
| 64 V H | 0.007 | 0.993 | 0.000 |
| 65 T H | 0.005 | 0.995 | 0.000 |
| 66 E H | 0.010 | 0.990 | 0.000 |
| 67 E H | 0.010 | 0.990 | 0.000 |
| 68 K H | 0.009 | 0.992 | 0.000 |
| 69 Y H | 0.008 | 0.993 | 0.000 |
| 70 Q H | 0.005 | 0.996 | 0.000 |
| 71 E H | 0.004 | 0.996 | 0.000 |
| 72 A H | 0.006 | 0.995 | 0.000 |
| 73 L H | 0.017 | 0.984 | 0.001 |
| 74 A H | 0.084 | 0.915 | 0.002 |
| 75 K C | 0.799 | 0.231 | 0.000 |
| 76 G C | 0.989 | 0.011 | 0.000 |
| 77 D C | 0.978 | 0.019 | 0.001 |
| 78 V H | 0.216 | 0.783 | 0.001 |
| 79 T H | 0.095 | 0.895 | 0.003 |
| 80 A H | 0.024 | 0.976 | 0.001 |
| 81 Q H | 0.025 | 0.974 | 0.002 |
| 82 I H | 0.025 | 0.975 | 0.002 |
| 83 A H | 0.044 | 0.957 | 0.002 |

---

|         |       |       |       |
|---------|-------|-------|-------|
| 84 L H  | 0.077 | 0.924 | 0.001 |
| 85 Q H  | 0.075 | 0.925 | 0.001 |
| 86 P H  | 0.029 | 0.970 | 0.002 |
| 87 A H  | 0.050 | 0.951 | 0.002 |
| 88 L H  | 0.034 | 0.965 | 0.003 |
| 89 K H  | 0.149 | 0.845 | 0.005 |
| 90 F H  | 0.438 | 0.562 | 0.010 |
| 91 N C  | 0.747 | 0.225 | 0.017 |
| 92 G C  | 0.812 | 0.171 | 0.032 |
| 93 G C  | 0.779 | 0.223 | 0.034 |
| 94 G C  | 0.569 | 0.338 | 0.041 |
| 95 H C  | 0.602 | 0.337 | 0.047 |
| 96 I H  | 0.363 | 0.561 | 0.038 |
| 97 N H  | 0.235 | 0.713 | 0.032 |
| 98 H C  | 0.639 | 0.269 | 0.029 |
| 99 S C  | 0.472 | 0.446 | 0.048 |
| 100 I H | 0.201 | 0.723 | 0.046 |
| 101 F H | 0.229 | 0.691 | 0.057 |
| 102 W C | 0.753 | 0.224 | 0.013 |
| 103 T C | 0.539 | 0.410 | 0.021 |
| 104 N C | 0.731 | 0.238 | 0.014 |
| 105 L C | 0.919 | 0.086 | 0.015 |
| 106 S C | 0.983 | 0.008 | 0.008 |
| 107 P C | 0.981 | 0.010 | 0.007 |
| 108 N C | 0.959 | 0.027 | 0.006 |
| 109 G C | 0.964 | 0.022 | 0.005 |
| 110 G C | 0.968 | 0.022 | 0.006 |
| 111 G C | 0.972 | 0.014 | 0.009 |
| 112 E C | 0.976 | 0.008 | 0.012 |
| 113 P C | 0.982 | 0.006 | 0.008 |
| 114 K C | 0.978 | 0.013 | 0.003 |
| 115 G H | 0.300 | 0.703 | 0.001 |
| 116 E H | 0.063 | 0.932 | 0.003 |
| 117 L H | 0.010 | 0.990 | 0.000 |
| 118 L H | 0.006 | 0.994 | 0.000 |
| 119 E H | 0.003 | 0.997 | 0.000 |
| 120 A H | 0.004 | 0.997 | 0.000 |
| 121 I H | 0.005 | 0.995 | 0.000 |
| 122 K H | 0.006 | 0.995 | 0.000 |
| 123 R H | 0.018 | 0.983 | 0.001 |
| 124 D H | 0.064 | 0.936 | 0.002 |
| 125 F H | 0.432 | 0.581 | 0.001 |



---

|         |       |       |       |
|---------|-------|-------|-------|
| 126 G C | 0.940 | 0.081 | 0.001 |
| 127 S C | 0.974 | 0.025 | 0.002 |
| 128 F H | 0.020 | 0.980 | 0.000 |
| 129 D H | 0.015 | 0.985 | 0.001 |
| 130 K H | 0.007 | 0.994 | 0.000 |
| 131 F H | 0.004 | 0.996 | 0.000 |
| 132 K H | 0.003 | 0.997 | 0.000 |
| 133 E H | 0.003 | 0.997 | 0.000 |
| 134 K H | 0.003 | 0.997 | 0.000 |
| 135 L H | 0.006 | 0.994 | 0.000 |
| 136 T H | 0.010 | 0.991 | 0.000 |
| 137 A H | 0.010 | 0.991 | 0.000 |
| 138 A H | 0.024 | 0.979 | 0.001 |
| 139 S H | 0.035 | 0.966 | 0.002 |
| 140 V H | 0.109 | 0.896 | 0.003 |
| 141 G H | 0.229 | 0.775 | 0.014 |
| 142 V C | 0.806 | 0.142 | 0.011 |
| 143 Q C | 0.879 | 0.061 | 0.043 |
| 144 G C | 0.886 | 0.028 | 0.065 |
| 145 S C | 0.941 | 0.014 | 0.044 |
| 146 G C | 0.697 | 0.026 | 0.274 |
| 147 W E | 0.089 | 0.005 | 0.860 |
| 148 G E | 0.023 | 0.002 | 0.949 |
| 149 W E | 0.021 | 0.002 | 0.934 |
| 150 L E | 0.017 | 0.001 | 0.931 |
| 151 G E | 0.014 | 0.001 | 0.964 |
| 152 F E | 0.014 | 0.003 | 0.944 |
| 153 N E | 0.091 | 0.006 | 0.893 |
| 154 K C | 0.966 | 0.010 | 0.020 |
| 155 E C | 0.983 | 0.011 | 0.006 |
| 156 R C | 0.981 | 0.013 | 0.004 |
| 157 G C | 0.984 | 0.004 | 0.021 |
| 158 H E | 0.392 | 0.006 | 0.591 |
| 159 L E | 0.041 | 0.003 | 0.955 |
| 160 Q E | 0.019 | 0.002 | 0.977 |
| 161 I E | 0.013 | 0.001 | 0.947 |
| 162 A E | 0.013 | 0.002 | 0.942 |
| 163 A E | 0.084 | 0.008 | 0.872 |
| 164 C C | 0.843 | 0.010 | 0.123 |
| 165 P C | 0.951 | 0.027 | 0.023 |
| 166 N C | 0.977 | 0.013 | 0.007 |
| 167 Q C | 0.949 | 0.033 | 0.013 |

---

|         |       |       |       |
|---------|-------|-------|-------|
| 168 D C | 0.963 | 0.019 | 0.015 |
| 169 P C | 0.944 | 0.032 | 0.018 |
| 170 L C | 0.904 | 0.071 | 0.024 |
| 171 Q C | 0.875 | 0.080 | 0.028 |
| 172 G C | 0.863 | 0.139 | 0.020 |
| 173 T C | 0.878 | 0.137 | 0.018 |
| 174 T C | 0.927 | 0.061 | 0.018 |
| 175 G C | 0.964 | 0.015 | 0.023 |
| 176 L C | 0.888 | 0.014 | 0.117 |
| 177 I C | 0.588 | 0.008 | 0.413 |
| 178 P E | 0.219 | 0.009 | 0.754 |
| 179 L E | 0.147 | 0.012 | 0.822 |
| 180 L E | 0.051 | 0.005 | 0.891 |
| 181 G E | 0.035 | 0.003 | 0.914 |
| 182 I E | 0.064 | 0.010 | 0.870 |
| 183 D E | 0.194 | 0.020 | 0.725 |
| 184 V H | 0.446 | 0.534 | 0.049 |
| 185 W H | 0.270 | 0.805 | 0.036 |
| 186 E H | 0.291 | 0.697 | 0.009 |
| 187 H C | 0.829 | 0.171 | 0.012 |
| 188 A H | 0.391 | 0.603 | 0.006 |
| 189 Y H | 0.412 | 0.574 | 0.011 |
| 190 Y H | 0.161 | 0.826 | 0.008 |
| 191 L H | 0.170 | 0.819 | 0.009 |
| 192 Q H | 0.425 | 0.561 | 0.014 |
| 193 Y C | 0.719 | 0.274 | 0.014 |
| 194 K C | 0.849 | 0.145 | 0.015 |
| 195 N C | 0.872 | 0.137 | 0.009 |
| 196 V C | 0.922 | 0.102 | 0.003 |
| 197 R C | 0.974 | 0.026 | 0.002 |
| 198 P H | 0.065 | 0.933 | 0.000 |
| 199 D H | 0.064 | 0.933 | 0.003 |
| 200 Y H | 0.014 | 0.986 | 0.001 |
| 201 L H | 0.007 | 0.993 | 0.001 |
| 202 K H | 0.014 | 0.987 | 0.001 |
| 203 A H | 0.022 | 0.979 | 0.002 |
| 204 I H | 0.047 | 0.955 | 0.003 |
| 205 W H | 0.028 | 0.974 | 0.013 |
| 206 N H | 0.124 | 0.853 | 0.048 |
| 207 V C | 0.472 | 0.414 | 0.050 |
| 208 I C | 0.531 | 0.392 | 0.071 |
| 209 N C | 0.955 | 0.036 | 0.014 |

|         |       |       |       |
|---------|-------|-------|-------|
| 210 W H | 0.034 | 0.963 | 0.001 |
| 211 E H | 0.022 | 0.978 | 0.001 |
| 212 N H | 0.011 | 0.989 | 0.000 |
| 213 V H | 0.004 | 0.996 | 0.000 |
| 214 T H | 0.003 | 0.997 | 0.000 |
| 215 E H | 0.003 | 0.997 | 0.000 |
| 216 R H | 0.005 | 0.996 | 0.000 |
| 217 Y H | 0.010 | 0.992 | 0.000 |
| 218 M H | 0.011 | 0.990 | 0.000 |
| 219 A H | 0.043 | 0.960 | 0.001 |
| 220 C H | 0.145 | 0.859 | 0.004 |
| 221 K H | 0.457 | 0.550 | 0.004 |
| 222 K C | 0.999 | 0.000 | 0.000 |

# # PSIPRED HFORMAT (PSIPRED V4.0)

Conf: 924664456735678622650358712999999946662130899998862888999999  
 Pred: CCHHHHHHHHHHHHHHHHHHHHHCCCCCCCCCCCCCCCCCCCCCHHHHHHHHHHHHHHHHHHH  
 AA: MLGRAVCGTSRQLAPALGYLGSRQKHSPLDLPYDYGALEPHINAQIMQLHHSKHHAAYVN

10 20 30 40 50 60

Conf: 999999999999985995899998899961565221430545148999999999489999  
 Pred: HHHHHHHHHHHHHHHCCCHHHHHHHHHHHHHCCCCCHCCHCCCCCCCCCCCCCHHHHHHH  
 AA: NLNVTEEKYQEALAKGDVTAQIALQPALKFNGGGHINHSIFWTNLSPNGGGEPKGELLEA

70 80 90 100 110 120

Conf: 999818999999999999975688847999998999919999779999987778971568  
 Pred: HHHHHCHHHHHHHHHHHHHHHCCCCEEEEEEEECCCCEEEEEEEECCCCCCCCCCCCCCCC  
 AA: IKRDFGSFDKFKEKLTAASVGVQSGWGWLGFNKERGHLQIAACPNQDPLQGTGLIPLL

130 140 150 160 170 180

Conf: 88505462166147789889999997019999999999709  
 Pred: EEEHHCHHHHHCCCCCHHHHHHHHHCCCHHHHHHHHHHHHHHC  
 AA: GIDVWEHAYYLQYKNVRPDYLKAIWNVINWENVTERYMACKK

190 200 210 220

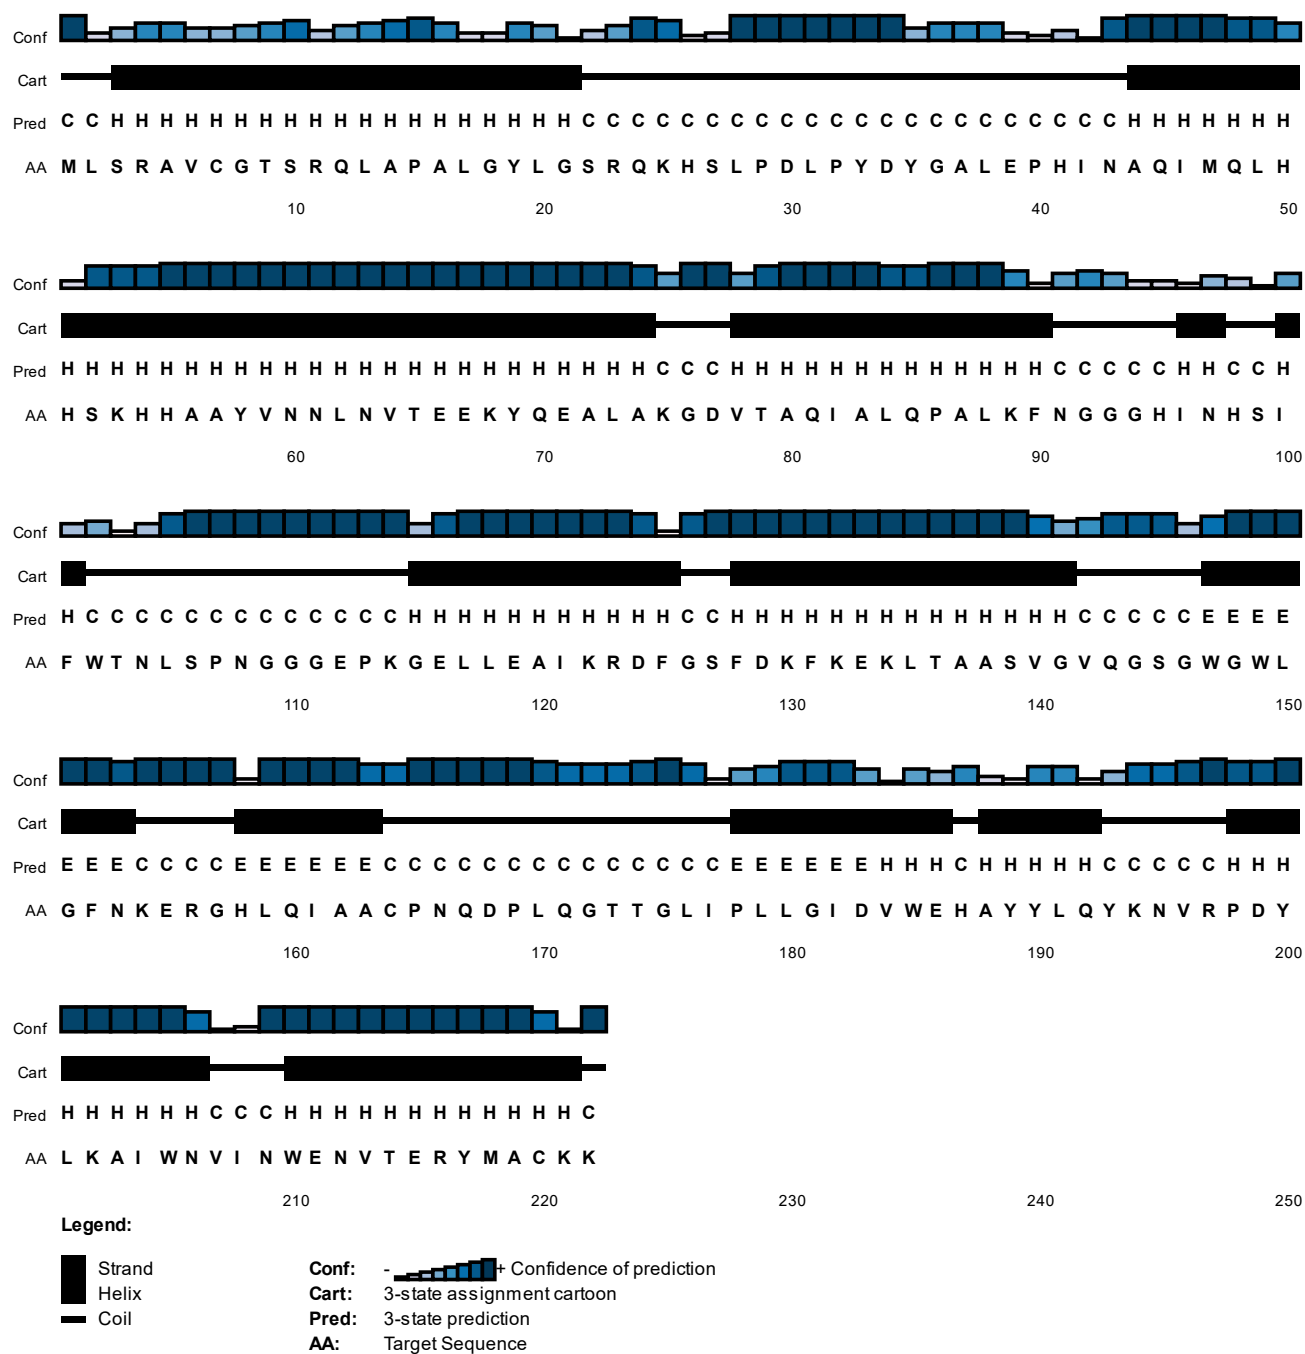

VAL variant

job,step,type,name,version,parameters  
psipred,0,Dataset,uniref90,latest,"null"

```

psipred,0,Dataset,hhdb uniclust30,2018_08,"null"
psipred,0,Software,psiblast,2.2.26,"-a 2 -b 0 -j 20 -h 0.01 -I F"
psipred,0,Software,hhblits,2.0.16,"-iterations 3 -diff inf -cov 10 -Z 10000 -B 10000 -maxfilt 10000 -maxmem 5 -norealign"
psipred,1,Software,psipred,4.1,"null"
psipred,2,Software,psipass2,4.1,"null"

```

# PSIPRED VFORMAT (PSIPRED V4.0)

|               |              |              |              |
|---------------|--------------|--------------|--------------|
| 1 M C         | 0.999        | 0.001        | 0.000        |
| 2 L C         | 0.660        | 0.349        | 0.014        |
| 3 S H         | 0.229        | 0.744        | 0.009        |
| 4 R H         | 0.125        | 0.858        | 0.012        |
| 5 A H         | 0.131        | 0.854        | 0.006        |
| 6 V H         | 0.146        | 0.854        | 0.004        |
| 7 C H         | 0.117        | 0.878        | 0.004        |
| 8 G H         | 0.121        | 0.873        | 0.003        |
| 9 T H         | 0.089        | 0.904        | 0.003        |
| 10 S H        | 0.098        | 0.896        | 0.005        |
| 11 R H        | 0.348        | 0.642        | 0.003        |
| 12 Q H        | 0.167        | 0.821        | 0.004        |
| 13 L H        | 0.163        | 0.827        | 0.004        |
| 14 A H        | 0.129        | 0.856        | 0.005        |
| 15 P H        | 0.064        | 0.932        | 0.006        |
| <b>16 V H</b> | <b>0.093</b> | <b>0.902</b> | <b>0.010</b> |
| 17 L H        | 0.196        | 0.798        | 0.018        |
| 18 G H        | 0.253        | 0.731        | 0.017        |
| 19 Y H        | 0.147        | 0.838        | 0.027        |
| 20 L H        | 0.217        | 0.777        | 0.023        |
| 21 G H        | 0.457        | 0.549        | 0.011        |
| 22 S C        | 0.664        | 0.348        | 0.016        |
| 23 R C        | 0.758        | 0.211        | 0.028        |
| 24 Q C        | 0.874        | 0.097        | 0.035        |
| 25 K C        | 0.846        | 0.057        | 0.073        |
| 26 H C        | 0.512        | 0.059        | 0.418        |
| 27 S C        | 0.585        | 0.021        | 0.395        |
| 28 L C        | 0.947        | 0.008        | 0.040        |
| 29 P C        | 0.985        | 0.007        | 0.011        |
| 30 D C        | 0.974        | 0.015        | 0.007        |
| 31 L C        | 0.982        | 0.010        | 0.005        |
| 32 P C        | 0.988        | 0.005        | 0.004        |
| 33 Y C        | 0.979        | 0.010        | 0.005        |
| 34 D C        | 0.977        | 0.012        | 0.004        |

---

|        |       |       |       |
|--------|-------|-------|-------|
| 35 Y C | 0.750 | 0.274 | 0.004 |
| 36 G C | 0.842 | 0.184 | 0.007 |
| 37 A C | 0.834 | 0.184 | 0.014 |
| 38 L C | 0.818 | 0.204 | 0.018 |
| 39 E C | 0.563 | 0.402 | 0.015 |
| 40 P C | 0.506 | 0.415 | 0.030 |
| 41 H C | 0.648 | 0.282 | 0.086 |
| 42 I C | 0.431 | 0.383 | 0.226 |
| 43 N C | 0.901 | 0.070 | 0.021 |
| 44 A H | 0.043 | 0.950 | 0.001 |
| 45 Q H | 0.023 | 0.976 | 0.002 |
| 46 I H | 0.029 | 0.972 | 0.001 |
| 47 M H | 0.032 | 0.970 | 0.002 |
| 48 Q H | 0.076 | 0.924 | 0.004 |
| 49 L H | 0.062 | 0.937 | 0.008 |
| 50 H H | 0.167 | 0.830 | 0.005 |
| 51 H H | 0.381 | 0.605 | 0.003 |
| 52 S H | 0.079 | 0.914 | 0.003 |
| 53 K H | 0.050 | 0.949 | 0.003 |
| 54 H H | 0.094 | 0.898 | 0.003 |
| 55 H H | 0.035 | 0.963 | 0.002 |
| 56 A H | 0.011 | 0.989 | 0.001 |
| 57 A H | 0.010 | 0.991 | 0.001 |
| 58 Y H | 0.021 | 0.980 | 0.001 |
| 59 V H | 0.030 | 0.971 | 0.001 |
| 60 N H | 0.039 | 0.961 | 0.001 |
| 61 N H | 0.045 | 0.954 | 0.001 |
| 62 L H | 0.014 | 0.986 | 0.001 |
| 63 N H | 0.009 | 0.992 | 0.000 |
| 64 V H | 0.007 | 0.993 | 0.000 |
| 65 T H | 0.005 | 0.995 | 0.000 |
| 66 E H | 0.011 | 0.990 | 0.000 |
| 67 E H | 0.010 | 0.990 | 0.000 |
| 68 K H | 0.009 | 0.992 | 0.000 |
| 69 Y H | 0.008 | 0.993 | 0.000 |
| 70 Q H | 0.005 | 0.996 | 0.000 |
| 71 E H | 0.004 | 0.996 | 0.000 |
| 72 A H | 0.006 | 0.995 | 0.000 |
| 73 L H | 0.017 | 0.984 | 0.001 |
| 74 A H | 0.085 | 0.914 | 0.002 |
| 75 K C | 0.801 | 0.227 | 0.000 |
| 76 G C | 0.989 | 0.011 | 0.000 |

---

|         |       |       |       |
|---------|-------|-------|-------|
| 77 D C  | 0.978 | 0.018 | 0.001 |
| 78 V H  | 0.226 | 0.774 | 0.001 |
| 79 T H  | 0.100 | 0.888 | 0.003 |
| 80 A H  | 0.025 | 0.975 | 0.001 |
| 81 Q H  | 0.025 | 0.974 | 0.002 |
| 82 I H  | 0.024 | 0.976 | 0.002 |
| 83 A H  | 0.043 | 0.958 | 0.002 |
| 84 L H  | 0.077 | 0.923 | 0.001 |
| 85 Q H  | 0.092 | 0.907 | 0.001 |
| 86 P H  | 0.031 | 0.969 | 0.002 |
| 87 A H  | 0.052 | 0.950 | 0.002 |
| 88 L H  | 0.036 | 0.963 | 0.003 |
| 89 K H  | 0.145 | 0.849 | 0.005 |
| 90 F H  | 0.439 | 0.561 | 0.011 |
| 91 N C  | 0.745 | 0.225 | 0.017 |
| 92 G C  | 0.813 | 0.170 | 0.032 |
| 93 G C  | 0.787 | 0.215 | 0.034 |
| 94 G C  | 0.586 | 0.325 | 0.040 |
| 95 H C  | 0.622 | 0.320 | 0.046 |
| 96 I H  | 0.373 | 0.554 | 0.037 |
| 97 N H  | 0.228 | 0.724 | 0.030 |
| 98 H C  | 0.634 | 0.269 | 0.029 |
| 99 S C  | 0.505 | 0.427 | 0.045 |
| 100 I H | 0.189 | 0.738 | 0.042 |
| 101 F H | 0.235 | 0.687 | 0.053 |
| 102 W C | 0.770 | 0.212 | 0.012 |
| 103 T C | 0.550 | 0.405 | 0.020 |
| 104 N C | 0.727 | 0.245 | 0.013 |
| 105 L C | 0.916 | 0.091 | 0.015 |
| 106 S C | 0.984 | 0.008 | 0.008 |
| 107 P C | 0.982 | 0.009 | 0.007 |
| 108 N C | 0.959 | 0.028 | 0.006 |
| 109 G C | 0.964 | 0.023 | 0.005 |
| 110 G C | 0.969 | 0.021 | 0.006 |
| 111 G C | 0.973 | 0.014 | 0.008 |
| 112 E C | 0.976 | 0.007 | 0.011 |
| 113 P C | 0.982 | 0.006 | 0.008 |
| 114 K C | 0.978 | 0.013 | 0.003 |
| 115 G H | 0.312 | 0.691 | 0.001 |
| 116 E H | 0.066 | 0.928 | 0.003 |
| 117 L H | 0.011 | 0.990 | 0.000 |
| 118 L H | 0.006 | 0.994 | 0.000 |

---

|         |       |       |       |
|---------|-------|-------|-------|
| 119 E H | 0.003 | 0.997 | 0.000 |
| 120 A H | 0.004 | 0.997 | 0.000 |
| 121 I H | 0.005 | 0.996 | 0.000 |
| 122 K H | 0.006 | 0.995 | 0.000 |
| 123 R H | 0.018 | 0.984 | 0.001 |
| 124 D H | 0.060 | 0.940 | 0.002 |
| 125 F H | 0.420 | 0.592 | 0.001 |
| 126 G C | 0.948 | 0.070 | 0.001 |
| 127 S C | 0.975 | 0.023 | 0.002 |
| 128 F H | 0.020 | 0.981 | 0.000 |
| 129 D H | 0.015 | 0.985 | 0.001 |
| 130 K H | 0.007 | 0.994 | 0.000 |
| 131 F H | 0.004 | 0.996 | 0.000 |
| 132 K H | 0.003 | 0.997 | 0.000 |
| 133 E H | 0.003 | 0.997 | 0.000 |
| 134 K H | 0.003 | 0.997 | 0.000 |
| 135 L H | 0.006 | 0.994 | 0.000 |
| 136 T H | 0.010 | 0.991 | 0.000 |
| 137 A H | 0.010 | 0.991 | 0.000 |
| 138 A H | 0.023 | 0.980 | 0.001 |
| 139 S H | 0.034 | 0.967 | 0.002 |
| 140 V H | 0.113 | 0.891 | 0.003 |
| 141 G H | 0.223 | 0.782 | 0.013 |
| 142 V C | 0.808 | 0.143 | 0.010 |
| 143 Q C | 0.882 | 0.061 | 0.040 |
| 144 G C | 0.888 | 0.027 | 0.064 |
| 145 S C | 0.939 | 0.015 | 0.045 |
| 146 G C | 0.686 | 0.029 | 0.280 |
| 147 W E | 0.090 | 0.005 | 0.857 |
| 148 G E | 0.023 | 0.002 | 0.948 |
| 149 W E | 0.021 | 0.002 | 0.933 |
| 150 L E | 0.017 | 0.001 | 0.930 |
| 151 G E | 0.014 | 0.001 | 0.964 |
| 152 F E | 0.014 | 0.003 | 0.943 |
| 153 N E | 0.092 | 0.006 | 0.892 |
| 154 K C | 0.966 | 0.010 | 0.021 |
| 155 E C | 0.983 | 0.011 | 0.007 |
| 156 R C | 0.981 | 0.013 | 0.004 |
| 157 G C | 0.984 | 0.004 | 0.021 |
| 158 H E | 0.370 | 0.006 | 0.615 |
| 159 L E | 0.039 | 0.003 | 0.957 |
| 160 Q E | 0.019 | 0.001 | 0.977 |



---

|         |       |       |       |
|---------|-------|-------|-------|
| 161 I E | 0.013 | 0.001 | 0.947 |
| 162 A E | 0.013 | 0.002 | 0.942 |
| 163 A E | 0.084 | 0.008 | 0.869 |
| 164 C C | 0.824 | 0.010 | 0.137 |
| 165 P C | 0.945 | 0.029 | 0.025 |
| 166 N C | 0.976 | 0.014 | 0.008 |
| 167 Q C | 0.948 | 0.034 | 0.014 |
| 168 D C | 0.962 | 0.019 | 0.015 |
| 169 P C | 0.944 | 0.033 | 0.018 |
| 170 L C | 0.905 | 0.070 | 0.024 |
| 171 Q C | 0.878 | 0.079 | 0.027 |
| 172 G C | 0.866 | 0.138 | 0.020 |
| 173 T C | 0.874 | 0.140 | 0.019 |
| 174 T C | 0.926 | 0.061 | 0.018 |
| 175 G C | 0.963 | 0.016 | 0.023 |
| 176 L C | 0.892 | 0.015 | 0.111 |
| 177 I C | 0.549 | 0.008 | 0.446 |
| 178 P E | 0.215 | 0.009 | 0.759 |
| 179 L E | 0.151 | 0.013 | 0.812 |
| 180 L E | 0.052 | 0.005 | 0.889 |
| 181 G E | 0.035 | 0.003 | 0.912 |
| 182 I E | 0.063 | 0.010 | 0.870 |
| 183 D E | 0.189 | 0.019 | 0.729 |
| 184 V H | 0.449 | 0.526 | 0.051 |
| 185 W H | 0.280 | 0.791 | 0.039 |
| 186 E H | 0.310 | 0.675 | 0.012 |
| 187 H C | 0.832 | 0.163 | 0.015 |
| 188 A H | 0.440 | 0.547 | 0.007 |
| 189 Y H | 0.432 | 0.551 | 0.013 |
| 190 Y H | 0.172 | 0.815 | 0.009 |
| 191 L H | 0.178 | 0.808 | 0.010 |
| 192 Q H | 0.438 | 0.546 | 0.015 |
| 193 Y C | 0.726 | 0.262 | 0.015 |
| 194 K C | 0.854 | 0.138 | 0.015 |
| 195 N C | 0.872 | 0.136 | 0.010 |
| 196 V C | 0.925 | 0.091 | 0.003 |
| 197 R C | 0.972 | 0.028 | 0.002 |
| 198 P H | 0.071 | 0.928 | 0.000 |
| 199 D H | 0.065 | 0.933 | 0.003 |
| 200 Y H | 0.015 | 0.985 | 0.001 |
| 201 L H | 0.008 | 0.992 | 0.001 |
| 202 K H | 0.014 | 0.987 | 0.001 |

---

|         |       |       |       |
|---------|-------|-------|-------|
| 203 A H | 0.024 | 0.977 | 0.002 |
| 204 I H | 0.046 | 0.955 | 0.003 |
| 205 W H | 0.029 | 0.973 | 0.013 |
| 206 N H | 0.128 | 0.845 | 0.052 |
| 207 V C | 0.496 | 0.382 | 0.055 |
| 208 I C | 0.534 | 0.388 | 0.076 |
| 209 N C | 0.955 | 0.036 | 0.014 |
| 210 W H | 0.035 | 0.962 | 0.001 |
| 211 E H | 0.022 | 0.978 | 0.001 |
| 212 N H | 0.011 | 0.989 | 0.000 |
| 213 V H | 0.004 | 0.996 | 0.000 |
| 214 T H | 0.003 | 0.997 | 0.000 |
| 215 E H | 0.003 | 0.997 | 0.000 |
| 216 R H | 0.005 | 0.996 | 0.000 |
| 217 Y H | 0.009 | 0.992 | 0.000 |
| 218 M H | 0.011 | 0.990 | 0.000 |
| 219 A H | 0.042 | 0.961 | 0.001 |
| 220 C H | 0.144 | 0.861 | 0.004 |
| 221 K H | 0.459 | 0.548 | 0.003 |
| 222 K C | 0.999 | 0.000 | 0.000 |

## # PSIPRED HFORMAT (PSIPRED V4.0)

Conf: 935777778726678864650357701999999946661030899998862888999999

Pred: CCHHHHHHHHHHHHHHHHHHHHHCCCCCCCCCCCCCCCCCCCCCHHHHHHHHHHHHHHHHHHH

|        |    |    |    |    |    |    |    |    |    |    |    |    |    |    |    |    |    |    |    |    |    |    |    |    |    |    |    |    |
|--------|----|----|----|----|----|----|----|----|----|----|----|----|----|----|----|----|----|----|----|----|----|----|----|----|----|----|----|----|
| AA: ML | SR | AV | CG | TS | RQ | LA | PV | LG | YS | RQ | KS | LP | DL | PD | YD | GA | LE | PH | IN | AQ | IM | QL | HH | SK | HH | AA | YV | N  |
|        |    |    |    |    |    | 10 |    |    |    |    | 20 |    |    |    |    |    |    |    |    |    |    |    |    |    |    | 50 |    | 60 |

Conf: 9999999999999985995799998898971565231430545148999999999389999

Pred: HHHHHHHHHHHHHHHHHHHHHCCCHHHHHHHHHHHHHCCCCCHHCHHCCCCCCCCCCCCCHHHHHHH

|        |    |    |    |    |     |    |    |    |    |     |   |   |    |    |    |    |   |    |    |   |   |    |    |    |    |    |   |   |   |   |   |   |   |   |   |
|--------|----|----|----|----|-----|----|----|----|----|-----|---|---|----|----|----|----|---|----|----|---|---|----|----|----|----|----|---|---|---|---|---|---|---|---|---|
| AA: NL | NV | TE | EK | YQ | EAL | AK | GD | VT | AQ | IAL | Q | P | AL | KF | NG | GG | H | IN | HS | I | F | WT | NL | SP | NG | GG | E | P | K | G | E | L | L | E | A |
|        |    |    |    |    |     |    |    |    |    |     |   |   |    |    |    |    |   |    |    |   |   |    |    |    |    |    |   |   |   |   |   |   |   |   |   |
|        |    |    |    |    |     |    |    |    |    |     |   |   |    |    |    |    |   |    |    |   |   |    |    |    |    |    |   |   |   |   |   |   |   |   |   |

Conf: 999818999999999999975688847999998999929999769999987778971568

Pred: HHHHHCCHHHHHHHHHHHHHHHHHCCCCCEEEEEEECCCCCEEEEEEECCCCCCCCCCCCCCCCCEEE

|        |   |   |   |   |   |   |   |   |   |   |   |   |   |   |   |   |   |   |   |   |   |   |   |   |   |   |   |   |   |   |   |   |   |   |   |   |   |   |   |   |   |   |   |   |   |   |   |   |   |   |   |   |   |   |   |   |  |  |  |
|--------|---|---|---|---|---|---|---|---|---|---|---|---|---|---|---|---|---|---|---|---|---|---|---|---|---|---|---|---|---|---|---|---|---|---|---|---|---|---|---|---|---|---|---|---|---|---|---|---|---|---|---|---|---|---|---|---|--|--|--|
| AA: IK | R | D | F | G | S | F | D | K | F | K | E | K | L | T | A | A | S | V | G | V | Q | G | S | G | W | G | L | G | F | N | K | E | R | G | H | L | Q | I | A | A | C | P | N | Q | D | P | L | Q | G | T | T | G | L | I | P | L |  |  |  |
|        |   |   |   |   |   |   |   |   |   |   |   |   |   |   |   |   |   |   |   |   |   |   |   |   |   |   |   |   |   |   |   |   |   |   |   |   |   |   |   |   |   |   |   |   |   |   |   |   |   |   |   |   |   |   |   |   |  |  |  |
|        |   |   |   |   |   |   |   |   |   |   |   |   |   |   |   |   |   |   |   |   |   |   |   |   |   |   |   |   |   |   |   |   |   |   |   |   |   |   |   |   |   |   |   |   |   |   |   |   |   |   |   |   |   |   |   |   |  |  |  |

Conf: 88505361166147789889999997119999999999709

Pred: EEEHHHCHHHHHCCCCCHHHHHHHHHHCCCHHHHHHHHHHHHHHC

|        |   |   |   |   |   |   |   |   |   |   |   |   |   |   |   |   |   |   |   |   |   |   |   |   |   |   |   |   |   |   |   |   |   |   |   |   |   |   |   |   |  |  |  |  |  |  |  |  |  |  |  |  |  |  |  |  |  |  |  |
|--------|---|---|---|---|---|---|---|---|---|---|---|---|---|---|---|---|---|---|---|---|---|---|---|---|---|---|---|---|---|---|---|---|---|---|---|---|---|---|---|---|--|--|--|--|--|--|--|--|--|--|--|--|--|--|--|--|--|--|--|
| AA: GI | D | V | W | E | H | A | Y | Y | L | Q | Y | K | N | V | R | P | D | Y | L | K | A | I | W | N | V | I | N | W | E | N | V | T | E | R | Y | M | A | C | K | K |  |  |  |  |  |  |  |  |  |  |  |  |  |  |  |  |  |  |  |
|        |   |   |   |   |   |   |   |   |   |   |   |   |   |   |   |   |   |   |   |   |   |   |   |   |   |   |   |   |   |   |   |   |   |   |   |   |   |   |   |   |  |  |  |  |  |  |  |  |  |  |  |  |  |  |  |  |  |  |  |
|        |   |   |   |   |   |   |   |   |   |   |   |   |   |   |   |   |   |   |   |   |   |   |   |   |   |   |   |   |   |   |   |   |   |   |   |   |   |   |   |   |  |  |  |  |  |  |  |  |  |  |  |  |  |  |  |  |  |  |  |

&lt;

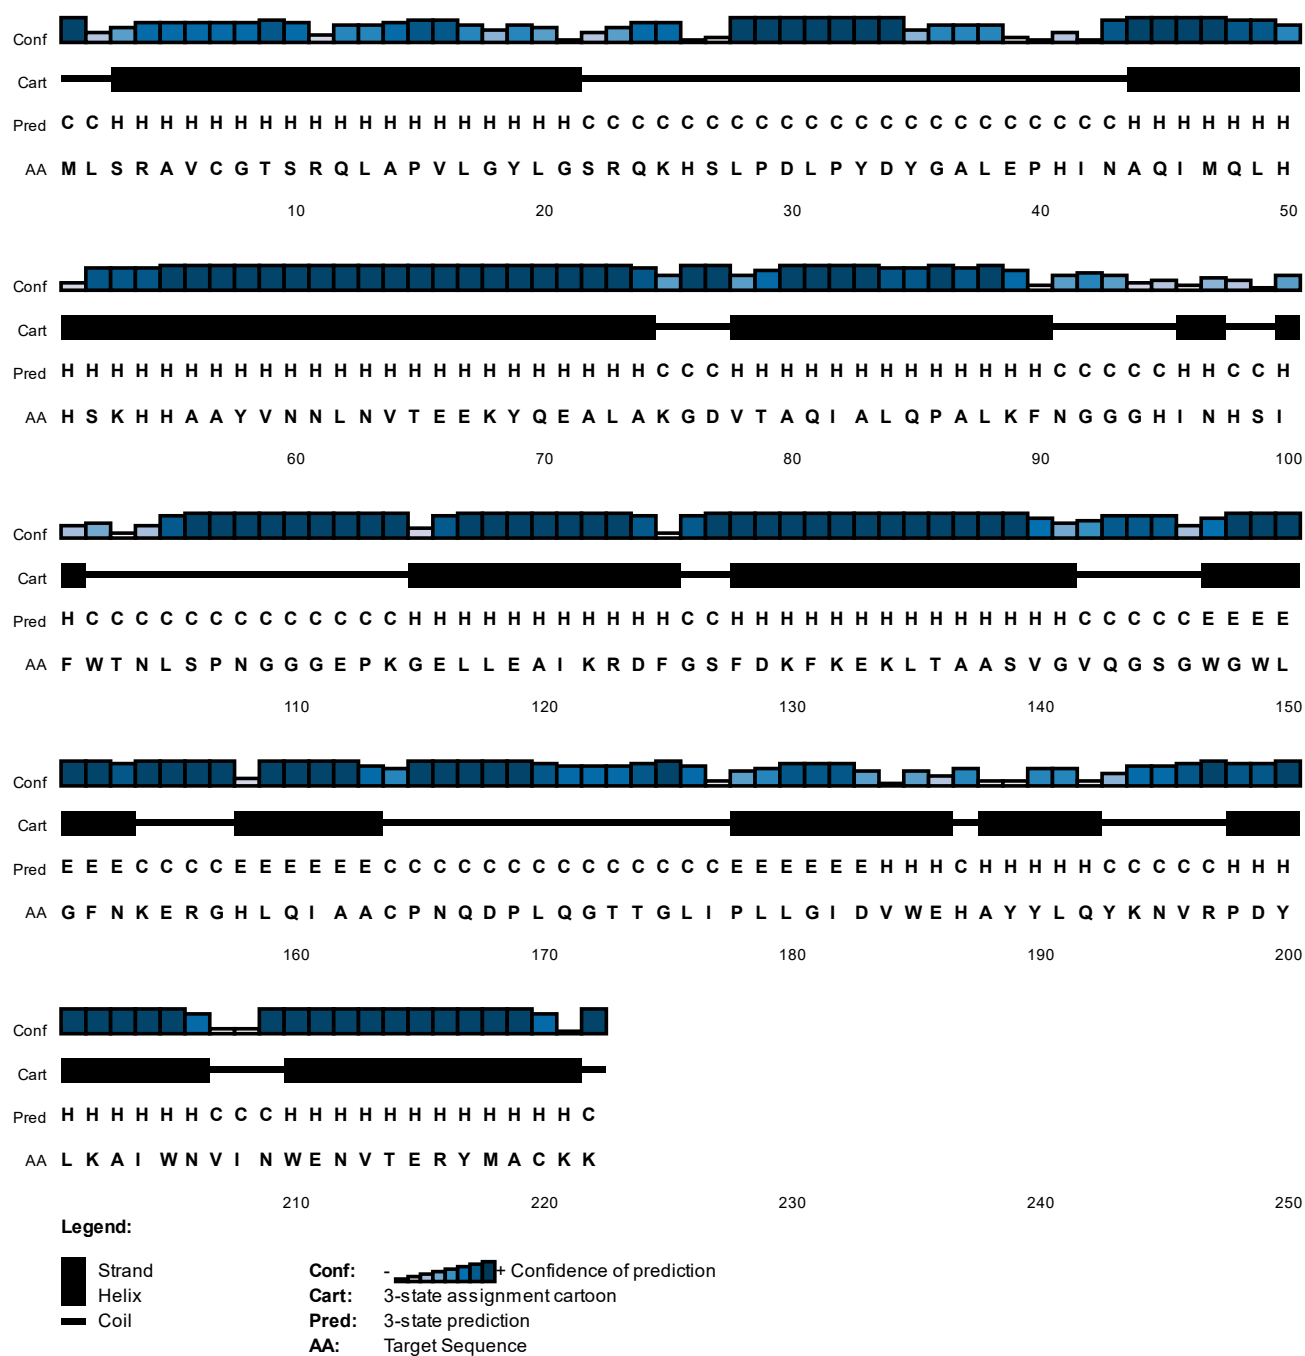

In the supplementary files we also enclose two videos:

**Movie S1:** MD simulation video of the Ala-MnSOD variant around the time where the Val-MnSOD exhibits a helical breakdown. The protein is presented in a green cartoon model while the MTS sequence is highlighted in a blue-colored cartoon model. The Mn ion is depicted as a purple colored sphere.

---

**Movie S2:** MD simulation video of the Val-MnSOD variant around the time where it exhibits a helical breakdown. The protein is presented in a green cartoon model while the MTS sequence is highlighted in an orange-colored cartoon model. The Mn ion is depicted as a purple colored sphere.
